# Supplementary material for: Impact of a nurse-led teleconsultation strategy for cardiovascular disease management during COVID-19 pandemic in India: a pyramid model feasibility study
Source: PubMed Central journal article supplement — BMJ Open. 2022 Jul 7;12(7):e056408. doi: 10.1136/bmjopen-2021-056408 (PMC9263376; doi:10.1136/bmjopen-2021-056408), 2022-07-07
Supplement: bmjopen-2021-056408supp001.pdf [file bmjopen-2021-056408supp001.pdf]

## HERO DMC HEART INSTITUTE

HELPLINE No.-9915322741

### Teleconsultation in cardiovascular disease management during the COVID-19 pandemic in India

- 1) Name:..... Age:.....
- 2) Sex:.....
- 3) MRD Number:.....
- 4) Phone Number:.....
- 5) Symptoms (tick all applicable symptoms):
 

|                                                |
|------------------------------------------------|
| Patient well being scale<br>0-Worst<br>10-Good |
|------------------------------------------------|

  - a) Chest pain
  - b) Palpitation
  - c) Breathlessness
  - d) Fatigue
  - e) Fever
  - f) Cough

|                                            |
|--------------------------------------------|
| 0   1   2   3   4   5   6   7   8   9   10 |
|--------------------------------------------|

|                 |
|-----------------|
| Refer to Doctor |
|-----------------|
- 6) Blood Pressure measured within one week:
  - a) No:
  - b) Yes:
    - i) Controlled Hypertension (Reading more than 130/80)
 

|                 |
|-----------------|
| Refer to Doctor |
|-----------------|
    - (1) Yes
    - (2) No
- 7) Blood glucose measured within in the last two weeks:
  - a) No
  - b) Yes
    - i) Controlled Diabetes (random blood sugar more than 200 mg)
 

|                 |
|-----------------|
| Refer to Doctor |
|-----------------|
    - (1) Yes
    - (2) No
- 8) Available medicines:
  - a) All Available
  - b) Some Available
  - c) Not Available
- 9) Compliance to medicines:
  - a) Regular
  - b) Sometimes missed
  - c) No medication
- 10) Regular exercise:
  - a) Yes

## **HERO DMC HEART INSTITUTE**

b) No

11) Prescribed medicines:

- a) Beta blockers
- b) Statin
- c) ACE inhibitors /ARBs
- d) Calcium channel blockers
- e) Anti-platelets

|                                                     |
|-----------------------------------------------------|
| Detail of medicines on Whats app<br>or text message |
|-----------------------------------------------------|

12) Any other complaint:

- (1) .....
- (2) .....
- (3) .....
