# Supplementary material for: Impact of a nurse-led teleconsultation strategy for cardiovascular disease management during COVID-19 pandemic in India: a pyramid model feasibility study
Source: PubMed Central journal article supplement — BMJ Open. 2022 Jul 7;12(7):e056408. doi: 10.1136/bmjopen-2021-056408 (PMC9263376; doi:10.1136/bmjopen-2021-056408), 2022-07-07
Supplement: bmjopen-2021-056408supp002.pdf [file bmjopen-2021-056408supp002.pdf]

## **HERO DMC HEART INSTITUTE**

HELPLINE No.-9915322741

### **Teleconsultation in cardiovascular disease management during the COVID-19 pandemic in India**

- 1) Name:..... Age:.....
- 2) Sex:.....
- 3) MRD Number:.....
- 4) Phone Number:.....
  
- 5) Frequency of stress from work/ responsibilities
  - a) Daily
  - b) Once in a week
  - c) Once in a month
  - d) Never
  
- 6) How are you able to manage the ongoing COVID-19 pandemic stress
  - a) Very easily
  - b) With little difficulty
  - c) With extreme difficulty
  - d) None of the above
  
- 7) Overall health status:  
Scale from 0-100 (%)  
Response: -----
  
- 8) Satisfaction score with the telemedicine  
Score:  
0 (fully satisfied), 1 ( ), 2 ( ), 3 ( ), 4 ( ), 5 ( ), 6 (unsatisfied)
